# Supplementary material for: Eight habitats, 38 threats and 55 experts: Assessing ecological risk in a multi-use marine region
Source: PLoS One. 2017 May 10;12(5):e0177393. doi: 10.1371/journal.pone.0177393 (PMC5425208; doi:10.1371/journal.pone.0177393)
Supplement: S1 Dataset — (XLSX) [file pone.0177393.s008.xlsx]

## Sheet: intertidal (rocky)
Scenario	Threat	Respondent								Mean (effect sore)	SE		Uncertainty score (worst minus best)								Mean	SE
		1	2	3	4	5	6	7	8				1	2	3	4	5	6	7	8
Best	Aquaculture: fish	0	0	1	2	0	0	2	1	0.75	0.313392		3	8	4	3	2	3	3	7	4.125	0.766194
Best	ASS	1	0	0	2	0	2	0	1	0.75	0.313392		2	8	6	4	2	3	8	4	4.625	0.864736
Best	Boating	0	0	2	2	0	0	2	0	0.75	0.365963		1	0	5	2	0	3	2	2	1.875	0.580563
Best	Brine	0	2	1	2	0	2	0	0	0.875	0.350382		3	2	6	5	2	4	8	7	4.625	0.800391
Best	Coastal activities	1	0	0	2	0	0	2	2	0.875	0.350382		2	8	4	2	1	3	2	2	3	0.779194
Best	Coastal HM	3	0	0	4	2	3	0	4	2	0.626783		4	4	8	4	4	3	2	4	4.125	0.610547
Best	Disease	0	0	0	2	0	1	0	2	0.625	0.323899		2	8	4	4	2	3	8	3	4.25	0.860855
Best	Extreme rainfall	0	0	0	2	4	1	0	4	1.375	0.625		0	8	3	3	4	2	0	4	3	0.906327
Best	F: illegal	1	0	1	2	0	0	6	3	1.625	0.730399		2	8	3	2	2	3	0	3	2.875	0.811469
Best	Global warming	2	0	3	4	4	0	4	1	2.25	0.61962		3	8	3	4	4	3	2	3	3.75	0.647798
Best	HABs	0	0	1	2	1	3	2	2	1.375	0.375		0	4	4	4	4	0	3	3	2.75	0.61962
Best	Heavy Metals	2	0	1	2	0	2	0	2	1.125	0.350382		1	4	3	2	2	3	8	4	3.375	0.754451
Best	Hot weather	2	0	2	2	5	2	6	2	2.625	0.679745		3	8	4	4	3	3	0	3	3.5	0.779194
Best	IS: filter feeders	2	0	2	3	0	2	5	2	2	0.566947		4	0	6	4	2	3	2	1	2.75	0.674802
Best	IS: fouling	1	0	2	4	1	2	5	2	2.125	0.580563		2	4	4	4	4	5	0	4	3.375	0.564975
Best	IS: predators	0	0	2	5	0	3	0	1	1.375	0.652947		2	8	3	3	1	2	8	4	3.875	0.953143
Best	Marine debris	0	0	0	2	0	1	0	0	0.375	0.263052		1	2	2	3	1	2	8	4	2.875	0.811469
Best	Marine HM: dredging	0	1	0	5	0	2	2	1	1.375	0.595744		3	3	8	3	2	4	2	6	3.875	0.742522
Best	Marine HM: jetties	1	0	2	2	2	5	2	4	2.25	0.559017		3	4	6	4	4	3	4	4	4	0.327327
Best	Marine HM: marinas	2	0	0	2	2	3	5	3	2.125	0.580563		4	4	7	4	4	3	0	5	3.875	0.692756
Best	Marine HM: ports	2	0	1	2	2	4	4	4	2.375	0.53243		3	4	6	4	4	2	1	4	3.5	0.534522
Best	Nutrient discharge	2	0	1	4	0	2	3	6	2.25	0.7258		4	4	4	4	4	4	2	1	3.375	0.419928
Best	Ocean acidification	0	0	3	4	2	1	5	3	2.25	0.647798		2	4	3	4	4	3	2	3	3.125	0.295048
Best	Oil spill	4	0	1	4	5	3	6	3	3.25	0.700765		4	6	7	4	3	4	0	2	3.75	0.773443
Best	Sea level	1	0	3	4	0	1	5	4	2.25	0.700765		3	8	4	4	2	5	0	3	3.625	0.822398
Best	Sediment	2	2	1	4	0	2	2	2	1.875	0.398098		3	2	5	4	2	4	4	6	3.75	0.49099
Best	Thermal	0	0	0	2	0	1	4	2	1.125	0.515388		3	8	8	4	0	2	2	3	3.75	1.0133
ML	Aquaculture: fish	2	4	3	3	0	2	3	5	2.75	0.526104
ML	ASS	2	4	3	4	0	4	4	3	3	0.5
ML	Boating	1	0	5	2	0	2	3	2	1.875	0.580563
ML	Brine	2	4	4	4	2	4	4	4	3.5	0.327327
ML	Coastal activities	2	6	3	2	0	2	2	4	2.625	0.625
ML	Coastal HM	5	4	4	6	4	5	1	6	4.375	0.564975
ML	Disease	1	4	2	4	0	3	4	3	2.625	0.53243
ML	Extreme rainfall	0	4	1	4	6	2	0	6	2.875	0.875
ML	F: illegal	2	8	2	4	0	1	6	5	3.5	0.963624
ML	Global warming	3	4	5	6	6	2	4	2	4	0.566947
ML	HABs	0	4	3	4	3	3	4	3	3	0.46291
ML	Heavy Metals	3	4	3	4	0	4	4	4	3.25	0.49099
ML	Hot weather	3	4	4	4	5	4	6	4	4.25	0.313392
ML	IS: filter feeders	4	0	4	5	0	4	6	2	3.125	0.789156
ML	IS: fouling	2	4	4	6	3	4	5	4	4	0.422577
ML	IS: predators	1	4	4	7	0	5	4	3	3.5	0.779194
ML	Marine debris	1	2	1	4	0	3	4	2	2.125	0.515388
ML	Marine HM: dredging	1	4	4	7	0	4	2	3	3.125	0.766194
ML	Marine HM: jetties	2	4	4	4	4	7	4	6	4.375	0.53243
ML	Marine HM: marinas	4	4	3	4	4	5	5	6	4.375	0.323899
ML	Marine HM: ports	3	4	4	4	4	5	4	6	4.25	0.313392
ML	Nutrient discharge	4	4	4	6	2	4	5	6	4.375	0.460493
ML	Ocean acidification	1	4	5	6	4	2	5	5	4	0.597614
ML	Oil spill	6	6	5	6	7	5	6	4	5.625	0.323899
ML	Sea level	2	4	5	6	1	3	5	6	4	0.654654
ML	Sediment	3	4	4	6	0	4	4	4	3.625	0.595744
ML	Thermal	2	4	4	4	0	3	4	3	3	0.5
Worst	Aquaculture: fish	3	8	5	5	2	3	5	8	4.875	0.789156
Worst	ASS	3	8	6	6	2	5	8	5	5.375	0.754451
Worst	Boating	1	0	7	4	0	3	4	2	2.625	0.843833
Worst	Brine	3	4	7	7	2	6	8	7	5.5	0.779194
Worst	Coastal activities	3	8	4	4	1	3	4	4	3.875	0.692756
Worst	Coastal HM	7	4	8	8	6	6	2	8	6.125	0.766194
Worst	Disease	2	8	4	6	2	4	8	5	4.875	0.833185
Worst	Extreme rainfall	0	8	3	5	8	3	0	8	4.375	1.20915
Worst	F: illegal	3	8	4	4	2	3	6	6	4.5	0.707107
Worst	Global warming	5	8	6	8	8	3	6	4	6	0.681385
Worst	HABs	0	4	5	6	5	3	5	5	4.125	0.666481
Worst	Heavy Metals	3	4	4	4	2	5	8	6	4.5	0.654654
Worst	Hot weather	5	8	6	6	8	5	6	5	6.125	0.440677
Worst	IS: filter feeders	6	0	8	7	2	5	7	3	4.75	0.995526
Worst	IS: fouling	3	4	6	8	5	7	5	6	5.5	0.566947
Worst	IS: predators	2	8	5	8	1	5	8	5	5.25	0.95898
Worst	Marine debris	1	2	2	5	1	3	8	4	3.25	0.839855
Worst	Marine HM: dredging	3	4	8	8	2	6	4	7	5.25	0.818317
Worst	Marine HM: jetties	4	4	8	6	6	8	6	8	6.25	0.590097
Worst	Marine HM: marinas	6	4	7	6	6	6	5	8	6	0.422577
Worst	Marine HM: ports	5	4	7	6	6	6	5	8	5.875	0.440677
Worst	Nutrient discharge	6	4	5	8	4	6	5	7	5.625	0.497763
Worst	Ocean acidification	2	4	6	8	6	4	7	6	5.375	0.679745
Worst	Oil spill	8	6	8	8	8	7	6	5	7	0.422577
Worst	Sea level	4	8	7	8	2	6	5	7	5.875	0.742522
Worst	Sediment	5	4	6	8	2	6	6	8	5.625	0.705527
Worst	Thermal	3	8	8	6	0	3	6	5	4.875	0.971698

## Sheet: intertidal (soft)
Scenario	Threat	Respondent score								Mean (effect sore)	SE		Uncertainty score (worst minus best)								Mean	SE
		1	2	3	4	5	6	7	8				1	2	3	4	5	6	7	8
Best	Aquaculture: fish	0	0	0	2	3	0	0	2	0.875	0.440677		4	8	2	3	1	1	2	4	3.125	0.811469
Best	Aquaculture: oyster	3	0	1	2	1	3	2	3	1.875	0.398098		4	4	3	3	1	4	4	4	3.375	0.375
Best	ASS	0	0	1	2	3	2	0	6	1.75	0.7258		6	4	5	4	1	4	4	2	3.75	0.559017
Best	Boating	0	0	0	4	3	1	0	3	1.375	0.595744		2	0	2	4	1	4	2	2	2.125	0.47949
Best	Brine	0	0	1	4	3	2	0	4	1.75	0.61962		3	8	5	2	2	3	0	2	3.125	0.854348
Best	Coastal activities	0	0	0	0	2	1	0	5	1	0.626783		2	6	3	4	1	4	4	3	3.375	0.53243
Best	Coastal HM	2	0	5	5	2	6	2	4	3.25	0.7258		6	6	2	3	2	2	4	2	3.375	0.625
Best	Disease	0	0	2	2	3	1	0	2	1.25	0.411877		4	8	2	3	2	3	2	1	3.125	0.766194
Best	Extreme rainfall	0	0	0	2	4	1	0	2	1.125	0.515388		4	8	3	4	2	3	4	2	3.75	0.674802
Best	F: illegal	1	0	0	2	2	1	0	2	1	0.327327		2	4	0	4	0	2	2	2	2	0.534522
Best	F: line	0	0	0	2	2	0	0	2	0.75	0.365963		2	0	0	2	3	3	2	2	1.75	0.411877
Best	F: nets	0	0	0	2	3	1	0	5	1.375	0.652947		4	8	3	3	2	2	2	2	3.25	0.7258
Best	F: pots	1	0	0	2	2	1	0	2	1	0.327327		2	0	1	1	2	3	2	3	1.75	0.365963
Best	Global warming	0	0	1	2	4	3	0	2	1.5	0.534522		3	8	3	4	2	4	2	6	4	0.731925
Best	HABs	1	0	0	2	3	4	0	3	1.625	0.564975		4	2	3	3	2	2	2	2	2.5	0.267261
Best	Heavy Metals	1	0	1	2	2	2	0	4	1.5	0.46291		7	8	4	4	2	3	2	2	4	0.823754
Best	Hot weather	0	0	2	4	3	1	0	4	1.75	0.61962		4	8	3	4	2	3	2	2	3.5	0.707107
Best	IS: filter feeders	0	0	0	4	2	1	0	2	1.125	0.515388		4	8	6	4	3	4	2	4	4.375	0.652947
Best	IS: fouling	0	0	2	4	2	0	0	2	1.25	0.526104		8	0	2	4	2	3	2	4	3.125	0.833185
Best	IS: predators	0	0	0	2	2	1	0	2	0.875	0.350382		3	8	2	4	2	3	2	4	3.5	0.707107
Best	Marine debris	0	0	0	2	2	1	2	5	1.5	0.597614		2	0	2	2	1	4	4	2	2.125	0.47949
Best	Marine HM: dredging	4	0	0	5	3	5	0	6	2.875	0.895176		4	8	3	3	2	3	2	2	3.375	0.705527
Best	Marine HM: jetties	3	0	2	4	2	6	4	5	3.25	0.674802		5	4	5	2	1	2	4	3	3.25	0.526104
Best	Marine HM: marinas	1	0	4	2	1	6	0	5	2.375	0.822398		6	4	2	4	2	2	4	3	3.375	0.497763
Best	Marine HM: ports	2	0	3	2	3	6	3	6	3.125	0.71807		6	0	4	2	1	2	4	2	2.625	0.679745
Best	Nutrient discharge	0	0	1	4	2	3	2	5	2.125	0.639126		7	6	3	3	2	4	4	1	3.75	0.700765
Best	Ocean acidification	0	0	2	2	3	4	0	3	1.75	0.559017		3	8	3	4	2	3	2	4	3.625	0.679745
Best	Oil spill	4	0	1	4	3	6	2	6	3.25	0.773443		4	8	4	4	3	2	4	2	3.875	0.666481
Best	Sea level	0	0	4	2	4	6	0	5	2.625	0.864736		5	8	3	4	2	2	2	3	3.625	0.730399
Best	Sediment	0	0	1	4	2	2	0	4	1.625	0.595744		7	8	3	4	3	4	2	2	4.125	0.789156
Best	Thermal	1	0	1	4	2	1	0	4	1.625	0.564975		5	8	3	4	2	3	2	2	3.625	0.730399
ML	Aquaculture: fish	2	4	0	4	3	0	0	4	2.125	0.666481
ML	Aquaculture: oyster	5	4	2	4	2	5	4	4	3.75	0.411877
ML	ASS	4	4	3	4	3	4	2	6	3.75	0.411877
ML	Boating	0	0	0	6	3	3	0	3	1.875	0.789156
ML	Brine	0	4	3	6	3	3	0	4	2.875	0.71807
ML	Coastal activities	0	6	2	2	2	3	2	6	2.875	0.742522
ML	Coastal HM	4	6	6	7	3	8	4	4	5.25	0.61962
ML	Disease	2	4	2	3	4	2	0	2	2.375	0.460493
ML	Extreme rainfall	2	4	0	4	4	2	2	4	2.75	0.526104
ML	F: illegal	1	4	0	4	2	1	0	2	1.75	0.559017
ML	F: line	0	0	0	3	3	1	1	3	1.375	0.497763
ML	F: nets	1	4	0	4	4	1	0	5	2.375	0.730399
ML	F: pots	1	0	0	3	2	2	0	3	1.375	0.460493
ML	Global warming	1	4	2	4	4	5	0	4	3	0.626783
ML	HABs	2	2	1	4	3	6	0	3	2.625	0.652947
ML	Heavy Metals	3	4	3	4	3	3	0	4	3	0.46291
ML	Hot weather	2	4	2	6	4	2	0	6	3.25	0.75
ML	IS: filter feeders	1	4	3	6	4	3	0	4	3.125	0.666481
ML	IS: fouling	1	0	2	6	4	1	0	4	2.25	0.773443
ML	IS: predators	1	4	1	4	2	2	0	4	2.25	0.559017
ML	Marine debris	1	0	1	3	2	3	4	6	2.5	0.681385
ML	Marine HM: dredging	6	8	1	7	3	7	0	7	4.875	1.09279
ML	Marine HM: jetties	5	4	5	6	2	8	6	6	5.25	0.61962
ML	Marine HM: marinas	3	4	5	4	2	8	2	6	4.25	0.7258
ML	Marine HM: ports	5	0	5	4	3	8	5	6	4.5	0.823754
ML	Nutrient discharge	3	6	2	6	4	5	4	5	4.375	0.497763
ML	Ocean acidification	1	4	3	4	3	6	0	5	3.25	0.700765
ML	Oil spill	5	8	2	6	5	8	4	6	5.5	0.707107
ML	Sea level	0	4	5	4	4	8	0	6	3.875	0.971698
ML	Sediment	4	4	2	6	3	4	0	4	3.375	0.625
ML	Thermal	3	4	1	6	3	2	0	6	3.125	0.766194
Worst	Aquaculture: fish	4	8	2	5	4	1	2	6	4	0.823754
Worst	Aquaculture: oyster	7	4	4	5	2	7	6	7	5.25	0.647798
Worst	ASS	6	4	6	6	4	6	4	8	5.5	0.5
Worst	Boating	2	0	2	8	4	5	2	5	3.5	0.886405
Worst	Brine	3	8	6	6	5	5	0	6	4.875	0.854348
Worst	Coastal activities	2	6	3	4	3	5	4	8	4.375	0.679745
Worst	Coastal HM	8	6	7	8	4	8	6	6	6.625	0.497763
Worst	Disease	4	8	4	5	5	4	2	3	4.375	0.625
Worst	Extreme rainfall	4	8	3	6	6	4	4	4	4.875	0.580563
Worst	F: illegal	3	4	0	6	2	3	2	4	3	0.626783
Worst	F: line	2	0	0	4	5	3	2	4	2.5	0.654654
Worst	F: nets	4	8	3	5	5	3	2	7	4.625	0.730399
Worst	F: pots	3	0	1	3	4	4	2	5	2.75	0.590097
Worst	Global warming	3	8	4	6	6	7	2	8	5.5	0.801784
Worst	HABs	5	2	3	5	5	6	2	5	4.125	0.548944
Worst	Heavy Metals	8	8	5	6	4	5	2	6	5.5	0.707107
Worst	Hot weather	4	8	5	8	5	4	2	6	5.25	0.7258
Worst	IS: filter feeders	4	8	6	8	5	5	2	6	5.5	0.707107
Worst	IS: fouling	8	0	4	8	4	3	2	6	4.375	0.998883
Worst	IS: predators	3	8	2	6	4	4	2	6	4.375	0.754451
Worst	Marine debris	2	0	2	4	3	5	6	7	3.625	0.822398
Worst	Marine HM: dredging	8	8	3	8	5	8	2	8	6.25	0.901388
Worst	Marine HM: jetties	8	4	7	6	3	8	8	8	6.5	0.707107
Worst	Marine HM: marinas	7	4	6	6	3	8	4	8	5.75	0.674802
Worst	Marine HM: ports	8	0	7	4	4	8	7	8	5.75	1.0133
Worst	Nutrient discharge	7	6	4	7	4	7	6	6	5.875	0.440677
Worst	Ocean acidification	3	8	5	6	5	7	2	7	5.375	0.730399
Worst	Oil spill	8	8	5	8	6	8	6	8	7.125	0.440677
Worst	Sea level	5	8	7	6	6	8	2	8	6.25	0.7258
Worst	Sediment	7	8	4	8	5	6	2	6	5.75	0.7258
Worst	Thermal	6	8	4	8	4	4	2	6	5.25	0.75

## Sheet: mangroves
Scenario	Threat	Respondent score						Mean (effect sore)	SE		Uncertainty score (worst minus best)						Mean	SE
		1	2	3	4	5	6				1	2	3	4	5	6
Best	Aquaculture: fish	0	4	0	0	0	0	0.666667	0.666667		5	2	2	1	6	3	3.16667	0.792324
Best	ASS	0	4	0	3	2	0	1.5	0.718795		2	2	2	4	4	5	3.16667	0.542627
Best	Boating	0	2	0	0	0	0	0.333333	0.333333		0	1	2	4	6	5	3	0.966092
Best	Brine	0	0	0	4	4	0	1.33333	0.843274		2	0	3	3	4	5	2.83333	0.703167
Best	Coastal activities	0	2	0	3	0	0	0.833333	0.542627		0	1	1	4	3	3	2	0.632456
Best	Coastal HM	0	6	2	7	4	2	3.5	1.08781		8	1	2	1	4	6	3.66667	1.17379
Best	Decrease rainfall	0	0	0	1	2	0	0.5	0.341565		0	0	2	3	6	3	2.33333	0.918937
Best	Disease	0	2	0	1	0	2	0.833333	0.401386		1	1	2	3	4	2	2.16667	0.477261
Best	Extreme rainfall	0	0	0	1	2	2	0.833333	0.401386		4	1	2	2	6	2	2.83333	0.749074
Best	F: illegal	0	1	0	2	2	1	1	0.365148		2	1	0	2	4	3	2	0.57735
Best	Global warming	0	0	0	1	2	0	0.5	0.341565		0	2	2	3	6	4	2.83333	0.833333
Best	HABs	0	0	0	2	1	3	1	0.516398		1	1	2	1	4	3	2	0.516398
Best	Heavy Metals	0	2	0	3	0	0	0.833333	0.542627		3	1	2	3	8	4	3.5	0.991632
Best	Hot weather	0	1	1	2	3	1	1.33333	0.421637		0	2	3	4	5	2	2.66667	0.71492
Best	IS: filter feeders	0	1	2	4	1	0	1.33333	0.614636		0	1	2	4	4	3	2.33333	0.666667
Best	IS: fouling	2	0	2	1	0	0	0.833333	0.401386		2	0	2	4	8	2	3	1.12546
Best	IS: predators	0	0	0	3	1	0	0.666667	0.494413		3	2	2	3	4	4	3	0.365148
Best	Marine debris		4	0	1	0	1	1.2	0.67082		0	1	2	3	6	2	2.33333	0.843274
Best	Marine HM: dredging	0	2	1	1	4	2	1.66667	0.557773		2	1	2	3	4	4	2.66667	0.494413
Best	Marine HM: jetties	0	1	0	3	4	2	1.66667	0.666667			1	2	3	4	5	3	0.645497
Best	Marine HM: marinas	2	3	0	5	6	2	3	0.894427		2	4	2	3	2	3	2.66667	0.333333
Best	Marine HM: ports	2	4	0	2	6	2	2.66667	0.843274		6	1	2	4	2	6	3.5	0.885061
Best	Nutrient discharge	0	4	0	1	5	1	1.83333	0.872417		2	2	2	3	3	5	2.83333	0.477261
Best	Ocean acidification	0	0	0	1	0	0	0.166667	0.166667		0	0	2	2	8	2	2.33333	1.20185
Best	Oil spill	0	6	0	8	4	3	3.5	1.31022		5	1	3	0	4	3	2.66667	0.760117
Best	Sea level	1	5	1	6	2	2	2.83333	0.872417		6	3	3	2	6	4	4	0.68313
Best	Sediment	0	2	0	1	4	3	1.66667	0.666667		8	2	3	3	4	5	4.16667	0.872417
Best	Thermal	2	3	0	2	2	0	1.5	0.5		0	1	2	3	6	4	2.66667	0.881917
ML	Aquaculture: fish	3	5	2	0	4	1	2.5	0.763763
ML	ASS	0	5	2	5	4	2	3	0.816497
ML	Boating	0	2	0	2	4	3	1.83333	0.654047
ML	Brine	1	0	2	5	6	3	2.83333	0.945751
ML	Coastal activities	0	2	0	5	2	0	1.5	0.806226
ML	Coastal HM	4	6	2	8	6	4	5	0.856349
ML	Decrease rainfall	0	0	1	2	4	1	1.33333	0.614636
ML	Disease	0	2	0	2	2	2	1.33333	0.421637
ML	Extreme rainfall	2	0	1	1	4	2	1.66667	0.557773
ML	F: illegal	0	1	0	3	4	2	1.66667	0.666667
ML	Global warming	0	0	0	2	6	3	1.83333	0.980363
ML	HABs	0	1	0	3	2	3	1.5	0.562731
ML	Heavy Metals	2	2	1	5	4	3	2.83333	0.600925
ML	Hot weather	0	2	2	3	6	1	2.33333	0.843274
ML	IS: filter feeders	0	1	2	6	3	3	2.5	0.846562
ML	IS: fouling	4	0	2	3	4	0	2.16667	0.749074
ML	IS: predators	0	0	1	4	3	2	1.66667	0.666667
ML	Marine debris		5	0	2	2	1	2	0.763763
ML	Marine HM: dredging	1	2	2	3	6	4	3	0.730297
ML	Marine HM: jetties	3	1	1	5	6	4	3.33333	0.843274
ML	Marine HM: marinas	6	4	2	6	6	3	4.5	0.718795
ML	Marine HM: ports	5	4	2	4	6	4	4.16667	0.542627
ML	Nutrient discharge	2	5	1	2	6	3	3.16667	0.792324
ML	Ocean acidification	0	0	0	2	4	1	1.16667	0.654047
ML	Oil spill	3	6	2	8	6	4	4.83333	0.909823
ML	Sea level	5	6	2	8	6	4	5.16667	0.833333
ML	Sediment	2	4	2	2	6	5	3.5	0.718795
ML	Thermal	2	3	1	4	4	2	2.66667	0.494413
Worst	Aquaculture: fish	5	6	2	1	6	3	3.83333	0.872417
Worst	ASS	2	6	2	7	6	5	4.66667	0.881917
Worst	Boating	0	3	2	4	6	5	3.33333	0.881917
Worst	Brine	2	0	3	7	8	5	4.16667	1.24944
Worst	Coastal activities	0	3	1	7	3	3	2.83333	0.980363
Worst	Coastal HM	8	7	4	8	8	8	7.16667	0.654047
Worst	Decrease rainfall	0	0	2	4	8	3	2.83333	1.22247
Worst	Disease	1	3	2	4	4	4	3	0.516398
Worst	Extreme rainfall	4	1	2	3	8	4	3.66667	0.988826
Worst	F: illegal	2	2	0	4	6	4	3	0.856349
Worst	Global warming	0	2	2	4	8	4	3.33333	1.11555
Worst	HABs	1	1	2	3	5	6	3	0.856349
Worst	Heavy Metals	3	3	2	6	8	4	4.33333	0.918937
Worst	Hot weather	0	3	4	6	8	3	4	1.12546
Worst	IS: filter feeders	0	2	4	8	5	3	3.66667	1.11555
Worst	IS: fouling	4	0	4	5	8	2	3.83333	1.10805
Worst	IS: predators	3	2	2	6	5	4	3.66667	0.666667
Worst	Marine debris		5	2	4	6	3	4	0.645497
Worst	Marine HM: dredging	2	3	3	4	8	6	4.33333	0.918937
Worst	Marine HM: jetties		2	2	6	8	7	5	1.1547
Worst	Marine HM: marinas	4	7	2	8	8	5	5.66667	0.988826
Worst	Marine HM: ports	8	5	2	6	8	8	6.16667	0.980363
Worst	Nutrient discharge	2	6	2	4	8	6	4.66667	0.988826
Worst	Ocean acidification	0	0	2	3	8	2	2.5	1.20416
Worst	Oil spill	5	7	3	8	8	6	6.16667	0.792324
Worst	Sea level	7	8	4	8	8	6	6.83333	0.654047
Worst	Sediment	8	4	3	4	8	8	5.83333	0.980363
Worst	Thermal	2	4	2	5	8	4	4.16667	0.909823

## Sheet: pelagic
Scenario	Threat	Respondent score												Mean (effect sore)	SE		Uncertainty score (worst minus best)												Mean	SE
		1	2	3	4	5	6	7	8	9	10	11	12				1	2	3	4	5	6	7	8	9	10	11	12
Best	Aquaculture: fish	3	0	6	2	4	0	2	4	0	1	0	0	1.83333	0.588183		4	4	0	4	3	2	1	3	4	4	2	8	3.25	0.578988
Best	Aquaculture: mussels	1	1	4	2	3	0	0	0	0	1	0	2	1.16667	0.385992		4	0	2	2	0	3	2	2	1	2	3	6	2.25	0.478714
Best	Boating	3	0	4	2	4	0	0	2	0	0	0	1	1.33333	0.466017		4	4	0	3	1	1	0	4	1	2	0	7	2.25	0.629153
Best	Brine	2	0	4	2	3	0	2	3	0	0	0	0	1.33333	0.432283		3	4	2	3	1	2	4	5	3	4	0	8	3.25	0.591928
Best	Disease	3	2	6	0	2	1	0	1	0	1	2	0	1.5	0.5		4	4	1	4	1	3	1	2	1	3	5	8	3.08333	0.608753
Best	Extreme rainfall	2	2	3	2	3	0	0	1	0	0	0	0	1.08333	0.35799		2	4	5	4	1	0	2	3	1	2	2	4	2.5	0.435194
Best	F: illegal	1	0	2	1	2	0	0	1	0	1	0	0	0.666667	0.224733		2	2	0	4	2	5	2	2	1	2	0	8	2.5	0.645497
Best	F: line	1	0	4	0	1	0	0	1	0	1	0	2	0.833333	0.34451		2	2	0	4	1	3	1	3	2	2	4	6	2.5	0.468718
Best	F: seine	1	1	4	1	2	0	0	1	0	2	2	2	1.33333	0.333333		2	2	1	2	2	2	2	2	5	2	4	6	2.66667	0.432283
Best	F: trawl	3	2	3	2	5	1	0	1	1	3	0	2	1.91667	0.416667		3	4	1	5	2	3	0	5	2	2	0	6	2.75	0.565752
Best	Global warming	2	2	4	2	4	1	2	1	2	1	0	0	1.75	0.37183		6	4	4	4	1	2	2	2	5	2	4	8	3.66667	0.581708
Best	HABs	3	2	2	2	3	1	2	2	1	1	0	0	1.58333	0.28758		4	2	4	4	1	7	2	4	2	3	4	4	3.41667	0.451569
Best	Heavy metals	1	0	4	2	1	1	2	1	1	1	0	0	1.16667	0.321769		3	4	3	2	2	5	2	5	5	4	4	8	3.91667	0.499368
Best	Hot weather	3	2	6	0	3	0	2	1	1	1	0	2	1.75	0.494286		3	4	2	4	0	1	2	5	5	4	2	6	3.16667	0.51981
Best	Marine debris	0	0	8	0	3	1	0	0	0	0	0	0	1	0.685344		4	4	0	3	3	2	2	4	1	2	2	6	2.75	0.462618
Best	Marine HM: dredging	3	2	4	2	2	0	0	1	0	2	0	1	1.41667	0.378561		5	4	2	5	1	5	2	4	1	2	2	7	3.33333	0.55505
Best	Marine HM: jetties	2	2	4	2	1	0	0	1	0	2	0	2	1.33333	0.355335		4	2	2	4	2	2	0	2	1	3	0	6	2.33333	0.497468
Best	Marine HM: marinas	3	0	4	2	1	1	0	2	0	2	0	2	1.41667	0.378561		3	4	2	2	2	3	0	3	1	4	2	6	2.66667	0.449467
Best	Marine HM: ports	2	2	4	2	3	3	0	0	0	3	0	2	1.75	0.410561		3	4	4	5	1	3	2	3	1	3	2	6	3.08333	0.434468
Best	Nutrient discharge	3	2	4	2	5	0	1	2	0	0	0	0	1.58333	0.499368		4	4	2	4	1	3	2	4	3	4	2	8	3.41667	0.514315
Best	Ocean acidification	1	2	6	2	4	0	1	1	1	0	2	2	1.83333	0.489795		5	4	2	6	0	2	3	5	4	2	4	6	3.58333	0.52884
Best	Oil spill	1	2	8	3	4	0	6	1	1	2	2	0	2.5	0.701729		6	4	0	4	1	4	2	4	5	3	4	8	3.75	0.616994
Best	Sediment	3	2	6	2	2	0	0	2	0	0	0	0	1.41667	0.52884		4	4	2	2	2	2	2	5	4	2	0	8	3.08333	0.596179
Best	Shipping - H	4	4	5	1	4	2	0	4	1	0	2	0	2.25	0.538305		4	4	1	4	0	2	3	2	3	4	2	8	3.08333	0.583333
Best	Shipping - L	1	0	0	1	1	0	0	0	0	0	0	0	0.25	0.130558		1	4	2	2	0	2	1	2	0	3	2	2	1.75	0.328564
Best	Shipping - M	2	2	2	1	2	2	0	1	0	0	0	0	1	0.275241		2	4	2	3	1	0	2	4	2	3	4	5	2.66667	0.414388
ML	Aquaculture: fish	5	2	6	3	6	0	3	5	3	3	2	4	3.5	0.514929
ML	Aquaculture: mussels	3	1	6	2	3	1	0	2	0	2	1	5	2.16667	0.534185
ML	Boating	5	2	4	3	5	0	0	4	1	1	0	5	2.5	0.596708
ML	Brine	4	2	6	3	4	0	4	5	1	2	0	4	2.91667	0.556754
ML	Disease	5	4	6	1	3	2	0	1	1	3	4	4	2.83333	0.534185
ML	Extreme rainfall	4	4	5	4	4	0	2	3	1	2	2	2	2.75	0.428617
ML	F: illegal	2	2	2	2	2	3	1	2	1	2	0	4	1.91667	0.28758
ML	F: line	2	0	4	1	1	1	0	2	1	2	2	7	1.91667	0.556754
ML	F: seine	2	2	4	1	3	0	1	1	2	2	4	7	2.41667	0.542976
ML	F: trawl	5	4	4	5	7	2	0	3	2	5	0	6	3.58333	0.645008
ML	Global warming	4	4	6	4	5	1	3	1	4	2	2	4	3.33333	0.449467
ML	HABs	4	3	4	3	4	4	2	2	3	2	2	2	2.91667	0.259905
ML	Heavy metals	3	2	6	2	3	3	4	2	3	3	2	4	3.08333	0.336162
ML	Hot weather	5	4	6	2	3	0	3	4	3	3	2	6	3.41667	0.499368
ML	Marine debris	2	2	8	2	5	1	1	3	1	2	2	3	2.66667	0.581708
ML	Marine HM: dredging	6	4	6	6	3	3	2	4	0	4	0	5	3.58333	0.608753
ML	Marine HM: jetties	3	3	6	3	1	1	0	2	0	4	0	6	2.41667	0.621074
ML	Marine HM: marinas	5	2	6	4	1	2	0	3	1	4	0	6	2.83333	0.625631
ML	Marine HM: ports	4	4	6	4	4	5	2	2	0	5	2	5	3.58333	0.499368
ML	Nutrient discharge	5	4	6	4	5	1	2	4	1	2	2	4	3.33333	0.481999
ML	Ocean acidification	3	4	6	4	4	1	3	4	3	2	4	7	3.75	0.462618
ML	Oil spill	5	4	8	4	5	1	6	3	3	4	4	8	4.58333	0.583333
ML	Sediment	5	4	8	2	2	0	0	4	1	2	0	4	2.66667	0.699928
ML	Shipping - H	6	6	6	3	4	2	2	4	1	2	4	4	3.66667	0.497468
ML	Shipping - L	2	2	2	2	1	0	1	0	0	2	2	1	1.25	0.25
ML	Shipping - M	4	4	4	2	2	2	1	2	1	2	2	3	2.41667	0.312815
Worst	Aquaculture: fish	7	4	6	6	7	2	3	7	4	5	2	8	5.08333	0.596179
Worst	Aquaculture: mussels	5	1	6	4	3	3	2	2	1	3	3	8	3.41667	0.596179
Worst	Boating	7	4	4	5	5	1	0	6	1	2	0	8	3.58333	0.792563
Worst	Brine	5	4	6	5	4	2	6	8	3	4	0	8	4.58333	0.668086
Worst	Disease	7	6	7	4	3	4	1	3	1	4	7	8	4.58333	0.690392
Worst	Extreme rainfall	4	6	8	6	4	0	2	4	1	2	2	4	3.58333	0.668086
Worst	F: illegal	3	2	2	5	4	5	2	3	1	3	0	8	3.16667	0.613402
Worst	F: line	3	2	4	4	2	3	1	4	2	3	4	8	3.33333	0.512471
Worst	F: seine	3	3	5	3	4	2	2	3	5	4	6	8	4	0.507519
Worst	F: trawl	6	6	4	7	7	4	0	6	3	5	0	8	4.66667	0.752101
Worst	Global warming	8	6	8	6	5	3	4	3	7	3	4	8	5.41667	0.583333
Worst	HABs	7	4	6	6	4	8	4	6	3	4	4	4	5	0.443813
Worst	Heavy metals	4	4	7	4	3	6	4	6	6	5	4	8	5.08333	0.434468
Worst	Hot weather	6	6	8	4	3	1	4	6	6	5	2	8	4.91667	0.633154
Worst	Marine debris	4	4	8	3	6	3	2	4	1	2	2	6	3.75	0.591928
Worst	Marine HM: dredging	8	6	6	7	3	5	2	5	1	4	2	8	4.75	0.686725
Worst	Marine HM: jetties	6	4	6	6	3	2	0	3	1	5	0	8	3.66667	0.752101
Worst	Marine HM: marinas	6	4	6	4	3	4	0	5	1	6	2	8	4.08333	0.668086
Worst	Marine HM: ports	5	6	8	7	4	6	2	3	1	6	2	8	4.83333	0.694495
Worst	Nutrient discharge	7	6	6	6	6	3	3	6	3	4	2	8	5	0.550482
Worst	Ocean acidification	6	6	8	8	4	2	4	6	5	2	6	8	5.41667	0.608753
Worst	Oil spill	7	6	8	7	5	4	8	5	6	5	6	8	6.25	0.391675
Worst	Sediment	7	6	8	4	4	2	2	7	4	2	0	8	4.5	0.773618
Worst	Shipping - H	8	8	6	5	4	4	3	6	4	4	4	8	5.33333	0.527046
Worst	Shipping - L	2	4	2	3	1	2	1	2	0	3	2	2	2	0.301511
Worst	Shipping - M	4	6	4	4	3	2	2	5	2	3	4	5	3.66667	0.376051

## Sheet: rocky reef
Scenario	Threat	Respondent score											Mean (effect sore)	SE		Uncertainty score (worst minus best)											Mean	SE
		1	2	3	4	5	6	7	8	9	10	11				1	2	3	4	5	6	7	8	9	10	11
Best	Aquaculture: fish	0	0	3	2	2	7	0	4	0	4	6	2.54545	0.755148		8	4	5	4	4	0	5	4	2	4	2	3.81818	0.615234
Best	Boating	0	0	1	0	0	0	1	4	0	1	2	0.818182	0.377026		2	3	1	2	2	2	3	4	2	2	2	2.27273	0.237062
Best	Brine	0	0	3	0	2	0	3	4	0	2	2	1.45455	0.454545		2	2	4	2	1	2	5	4	3	0	2	2.45455	0.434085
Best	Disease	0	0	3	0	0	0	2	4	0	3	2	1.27273	0.468865		4	2	3	2	1	1	3	4	2	1	4	2.45455	0.365902
Best	Extreme rainfall	1	0	0	0	0	2	1	2	0	0	4	0.909091	0.39207		5	2	2	4	0	1	4	4	2	2	2	2.54545	0.454545
Best	F: hand	0	0	2	0	0	1	1	2	0	1	0	0.636364	0.243935		2	5	4	2	2	3	2	4	1	1	3	2.63636	0.387831
Best	F: illegal	0	0	4	1	1	3	2	3	0	1	2	1.54545	0.412611		1	2	3	4	1	1	3	4	2	4	2	2.45455	0.365902
Best	F: line	0	0	1	1	1	2	1	2	0	1	0	0.818182	0.226362		3	2	1	2	1	1	3	3	2	1	2	1.90909	0.250619
Best	F: nets	0	0	3	0	0	3	1	2	0	1	2	1.09091	0.368154		4	2	4	3	1	2	3	4	1	3	2	2.63636	0.337712
Best	F: pots	0	1	2	0	0	3	1	2	0	1	0	0.909091	0.314918		4	3	3	3	1	2	3	4	1	2	2	2.54545	0.312283
Best	Global warming	0	2	5	0	0	2	0	6	0	4	6	2.27273	0.763853		2	5	3	4	3	1	7	2	2	4	2	3.18182	0.519058
Best	HABs	0	0	0	0	0	2	0	2	0	5	0	0.818182	0.482761		1	2	1	4	3	3	4	3	1	3	4	2.63636	0.363636
Best	Heavy Metals	0	0	3	0	1	0	1	3	0	6	0	1.27273	0.589158		6	2	4	4	3	0	3	4	2	2	2	2.90909	0.475864
Best	Hot weather	0	2	0	2	0	2	0	6	0	6	6	2.18182	0.78414		3	5	2	4	3	0	3	2	3	2	2	2.63636	0.387831
Best	IS: filter feeders	0	0	2	0	1	2	2	4	0	5	4	1.81818	0.552978		2	2	4	8	4	4	3	2	3	3	2	3.36364	0.526959
Best	IS: fouling	0	0	3	0	0	4	0	3	0	4	6	1.81818	0.671744		2	4	3	2	4	4	6	4	3	3	2	3.36364	0.363636
Best	IS: predators	0	0	1	0	0	1	1	2	0	3	4	1.09091	0.414609		3	2	3	3	2	4	4	4	3	2	4	3.09091	0.250619
Best	Marine debris	0	1	0	1	1	4	2	2	0	0	2	1.18182	0.377026		2	1	3	4	2	2	2	6	1	1	4	2.54545	0.474124
Best	Marine HM: dredging	0	0	7	3	2	0	0	6	0	8	6	2.90909	0.976585		4	4	1	4	2	0	7	2	3	0	2	2.63636	0.621914
Best	Marine HM: jetties	0	0	2	0	0	0	2	6	0	1	5	1.45455	0.651762		5	2	5	2	3	2	6	2	1	2	3	3	0.486172
Best	Marine HM: ports	2	2	3	2	2	2	0	6	0	8	6	3	0.774597		6	3	1	3	2	1	8	2	2	0	2	2.72727	0.701828
Best	Nutrient discharge	2	0	2	2	2	0	3	8	0	5	6	2.72727	0.787296		6	6	4	4	3	2	5	0	4	3	2	3.54545	0.545455
Best	Ocean acidification	0	2	4	0	0	0	0	4	0	1	6	1.54545	0.651762		4	3	4	4	2	3	8	4	2	4	2	3.63636	0.509415
Best	Oil spill	2	3	2	0	4	2	3	6	0	3	4	2.63636	0.526959		6	2	0	4	4	3	5	2	4	5	4	3.54545	0.511035
Best	Sea level rise	0	2	0	0	0	0	0	2	0	0	4	0.727273	0.406558		2	3	2	2	2	0	3	4	2	1	3	2.18182	0.325246
Best	Sediment	0	1	2	0	2	2	2	8	0	5	4	2.36364	0.741898		4	4	5	4	2	1	6	0	4	3	4	3.36364	0.526959
Best	Shipping - H	8	2	1	3	1	0	0	6	1	5	0	2.45455	0.82422		0	3	2	2	1	4	5	2	3	1	4	2.45455	0.454545
Best	Shipping - L	0	0	0	0	0	0	0	2	0	2	0	0.363636	0.243935		2	3	0	2	2	2	8	6	1	1	4	2.81818	0.711186
Best	Shipping - M	2	2	0	0	0	0	0	4	0	3	0	1	0.447214		6	1	2	4	2	4	8	4	2	3	4	3.63636	0.60712
ML	Aquaculture: fish	2	1	6	4	4	7	3	6	1	6	8	4.36364	0.729542
ML	Boating	0	1	1	0	2	2	2	6	1	3	2	1.81818	0.501238
ML	Brine	0	0	5	0	3	0	5	6	1	2	2	2.18182	0.685143
ML	Disease	0	0	3	0	0	0	3	6	0	3	2	1.54545	0.60848
ML	Extreme rainfall	2	0	0	2	0	2	3	4	2	0	6	1.90909	0.579256
ML	F: hand	0	2	3	1	1	2	3	4	0	1	1	1.63636	0.387831
ML	F: illegal	0	0	5	3	2	4	3	5	1	3	4	2.72727	0.54089
ML	F: line	1	0	1	2	2	3	3	3	0	1	2	1.63636	0.337712
ML	F: nets	0	0	5	1	1	3	3	4	1	3	4	2.27273	0.523813
ML	F: pots	1	1	3	1	1	4	3	4	1	3	0	2	0.426401
ML	Global warming	0	4	6	2	2	2	3	8	1	6	8	3.81818	0.84011
ML	HABs	0	0	1	2	2	3	2	4	0	6	2	2	0.555959
ML	Heavy Metals	2	0	5	2	3	0	2	5	1	6	2	2.54545	0.60848
ML	Hot weather	1	3	1	4	2	2	2	8	1	8	8	3.63636	0.887004
ML	IS: filter feeders	0	0	3	2	3	4	3	4	1	6	4	2.72727	0.557444
ML	IS: fouling	0	2	4	0	2	6	3	5	2	7	8	3.54545	0.813116
ML	IS: predators	0	0	2	1	1	3	3	4	1	4	6	2.27273	0.57352
ML	Marine debris	0	2	1	3	2	5	3	6	0	0	4	2.36364	0.621914
ML	Marine HM: dredging	0	1	8	5	2	0	4	8	2	8	8	4.18182	1.01639
ML	Marine HM: jetties	1	0	4	2	2	0	4	8	0	3	7	2.81818	0.829218
ML	Marine HM: ports	5	3	3	4	3	2	3	8	1	8	8	4.36364	0.766014
ML	Nutrient discharge	6	3	3	4	3	2	5	8	2	6	6	4.36364	0.591957
ML	Ocean acidification	2	3	4	2	2	1	2	6	0	3	6	2.81818	0.569181
ML	Oil spill	6	3	2	2	6	2	5	8	2	5	6	4.27273	0.647947
ML	Sea level rise	0	3	2	2	0	0	2	4	1	0	6	1.81818	0.584935
ML	Sediment	0	4	2	2	2	2	4	8	2	6	6	3.45455	0.718124
ML	Shipping - H	8	4	2	4	1	2	5	8	1	5	2	3.81818	0.7606
ML	Shipping - L	0	0	0	0	0	0	2	6	1	3	2	1.27273	0.57352
ML	Shipping - M	5	2	0	2	0	0	2	6	0	4	2	2.09091	0.638956
Worst	Aquaculture: fish	8	4	8	6	6	7	5	8	2	8	8	6.36364	0.60712
Worst	Boating	2	3	2	2	2	2	4	8	2	3	4	3.09091	0.546968
Worst	Brine	2	2	7	2	3	2	8	8	3	2	4	3.90909	0.756241
Worst	Disease	4	2	6	2	1	1	5	8	2	4	6	3.72727	0.701828
Worst	Extreme rainfall	6	2	2	4	0	3	5	6	2	2	6	3.45455	0.623241
Worst	F: hand	2	5	6	2	2	4	3	6	1	2	3	3.27273	0.523813
Worst	F: illegal	1	2	7	5	2	4	5	7	2	5	4	4	0.617914
Worst	F: line	3	2	2	3	2	3	4	5	2	2	2	2.72727	0.30424
Worst	F: nets	4	2	7	3	1	5	4	6	1	4	4	3.72727	0.57352
Worst	F: pots	4	4	5	3	1	5	4	6	1	3	2	3.45455	0.492925
Worst	Global warming	2	7	8	4	3	3	7	8	2	8	8	5.45455	0.790439
Worst	HABs	1	2	1	4	3	5	4	5	1	8	4	3.45455	0.651762
Worst	Heavy Metals	6	2	7	4	4	0	4	7	2	8	2	4.18182	0.77246
Worst	Hot weather	3	7	2	6	3	2	3	8	3	8	8	4.81818	0.77246
Worst	IS: filter feeders	2	2	6	8	5	6	5	6	3	8	6	5.18182	0.629837
Worst	IS: fouling	2	4	6	2	4	8	6	7	3	7	8	5.18182	0.685143
Worst	IS: predators	3	2	4	3	2	5	5	6	3	5	8	4.18182	0.552978
Worst	Marine debris	2	2	3	5	3	6	4	8	1	1	6	3.72727	0.688753
Worst	Marine HM: dredging	4	4	8	7	4	0	7	8	3	8	8	5.54545	0.813116
Worst	Marine HM: jetties	5	2	7	2	3	2	8	8	1	3	8	4.45455	0.845992
Worst	Marine HM: ports	8	5	4	5	4	3	8	8	2	8	8	5.72727	0.701828
Worst	Nutrient discharge	8	6	6	6	5	2	8	8	4	8	8	6.27273	0.604392
Worst	Ocean acidification	4	5	8	4	2	3	8	8	2	5	8	5.18182	0.736308
Worst	Oil spill	8	5	2	4	8	5	8	8	4	8	8	6.18182	0.671744
Worst	Sea level rise	2	5	2	2	2	0	3	6	2	1	7	2.90909	0.653029
Worst	Sediment	4	5	7	4	4	3	8	8	4	8	8	5.72727	0.61925
Worst	Shipping - H	8	5	3	5	2	4	5	8	4	6	4	4.90909	0.563343
Worst	Shipping - L	2	3	0	2	2	2	8	8	1	3	4	3.18182	0.78414
Worst	Shipping - M	8	3	2	4	2	4	8	8	2	6	4	4.63636	0.741898

## Sheet: saltmarsh
Scenario	Threat	Respondent score								Mean (effect sore)	SE		Uncertainty score (worst minus best)
		1	2	3	4	5	6	7	8				1	2	3	4	5	6	7	8	Mean	SE
Best	ASS	2	1	0	0	0	2	3	4	1.5	0.534522		4	1	2	6	8	2	2	4	3.625	0.843833
Best	Aquaculture: fish	1	0	0	0	0	0	0	0	0.125	0.125		4	0	0	2	0	2	2	0	1.25	0.526104
Best	Brine	0	1	0	0	0	1	0	1	0.375	0.182981		4	3	0	8	0	2	2	3	2.75	0.901388
Best	Global warming	0	0	0	2	4	0	3	2	1.375	0.564975		2	2	4	6	0	2	3	4	2.875	0.639126
Best	Rainfall decrease	2	1	0	2	0	0	0	1	0.75	0.313392		6	2	2	4	6	4	2	4	3.75	0.590097
Best	Extreme rainfall	2	0	0	0	0	1	0	0	0.375	0.263052		3	3	4	8	4	1	2	3	3.5	0.731925
Best	Hot weather	0	0	2	2	4	1	3	3	1.875	0.515388		3	2	2	4	0	3	2	3	2.375	0.419928
Best	Sea level rise	1	0	6	4	2	2	6	6	3.375	0.864736		4	4	2	4	4	2	2	2	3	0.377964
Best	Coastal activites	2	3	3	1	0	2	1	2	1.75	0.365963		6	3	5	4	6	0	4	3	3.875	0.692756
Best	Coastal HM	4	2	2	2	0	2	6	6	3	0.755929		0	4	4	6	8	3	2	2	3.625	0.885145
Best	Heavy Metals	0	0	0	0	0	0	3	1	0.5	0.377964		2	2	0	6	4	2	2	3	2.625	0.625
Best	Disease	1	1	0	0	0	0	3	1	0.75	0.365963		2	0	2	5	4	2	2	2	2.375	0.53243
Best	Marine debris	0	0	1	0	0	0	4	1	0.75	0.49099		4	2	0	3	4	1	2	2	2.25	0.49099
Best	Marine HM: ports	0	1	6	2	0	0	6	6	2.625	1.0166		3	4	2	6	6	4	2	2	3.625	0.595744
Best	Marine HM: jetties	0	1	4	2	0	3	4	6	2.5	0.755929		3	2	4	6	4	-2	2	2	2.625	0.822398
Best	Marine HM: marinas	1	2	7	2	0	1	6	4	2.875	0.895176		5	2	1	6	6	3	2	4	3.625	0.679745
Best	Marine HM: dredging	0	0	0	0	0	0	6	3	1.125	0.789156		2	2	8	8	4	2	2	4	4	0.92582
Best	Nutrient discharge	1	3	0	0	0	2	3	2	1.375	0.460493		1	1	3	6	6	2	2	3	3	0.707107
Best	Oil spill	2	2	2	0	0	2	5	6	2.375	0.754451		4	4	4	8	6	2	2	2	4	0.755929
Best	IS: predators	0	0	0	1	0	0	1	1	0.375	0.182981		2	2	0	5	4	2	2	4	2.625	0.564975
Best	Sediment	1	2	2	0	0	1	4	3	1.625	0.497763		1	5	3	5	6	2	2	2	3.25	0.647798
Best	Thermal	2	2	0	1	0	2	2	1	1.25	0.313392		0	0	0	5	2	1	2	0	1.25	0.61962
ML	ASS	5	0	0	0	0	2	5	6	2.25	0.940175
ML	Aquaculture: fish	4	0	0	0	0	2	0	0	0.75	0.526104
ML	Brine	4	1	0	3	0	2	0	2	1.5	0.534522
ML	Global warming	2	2	2	4	4	0	4	4	2.75	0.526104
ML	Rainfall decrease	5	2	2	4	2	2	0	3	2.5	0.534522
ML	Extreme rainfall	4	1	2	2	0	2	0	1	1.5	0.46291
ML	Hot weather	1	0	2	4	4	2	3	4	2.5	0.534522
ML	Sea level rise	2	2	8	4	4	2	8	8	4.75	0.995526
ML	Coastal activites	5	5	5	3	4	2	3	3	3.75	0.411877
ML	Coastal HM	6	4	4	6	4	3	8	8	5.375	0.679745
ML	Heavy Metals	2	2	0	2	2	2	3	2	1.875	0.295048
ML	Disease	2	1	1	0	2	0	5	1	1.5	0.566947
ML	Marine debris	2	1	1	1	2	0	4	1	1.5	0.422577
ML	Marine HM: ports	2	2	8	4	2	2	8	8	4.5	1.05221
ML	Marine HM: jetties	2	2	6	4	2	3	4	8	3.875	0.766194
ML	Marine HM: marinas	4	2	8	4	2	2	8	6	4.5	0.906327
ML	Marine HM: dredging	2	0	2	0	2	2	8	5	2.625	0.943729
ML	Nutrient discharge	1	3	0	2	2	2	4	3	2.125	0.440677
ML	Oil spill	4	4	4	0	4	2	6	8	4	0.845154
ML	IS: predators	1	0	0	3	2	1	1	3	1.375	0.419928
ML	Sediment	2	4	3	2	2	2	4	3	2.75	0.313392
ML	Thermal	3	2	0	2	0	2	2	2	1.625	0.375
Worst	ASS	6	2	2	6	8	4	5	8	5.125	0.833185
Worst	Aquaculture: fish	5	0	0	2	0	2	2	0	1.375	0.625
Worst	Brine	4	4	0	8	0	3	2	4	3.125	0.914906
Worst	Global warming	2	2	4	8	4	2	6	6	4.25	0.796196
Worst	Rainfall decrease	8	3	2	6	6	4	2	5	4.5	0.755929
Worst	Extreme rainfall	5	3	4	8	4	2	2	3	3.875	0.692756
Worst	Hot weather	3	2	4	6	4	4	5	6	4.25	0.49099
Worst	Sea level rise	5	4	8	8	6	4	8	8	6.375	0.652947
Worst	Coastal activites	8	6	8	5	6	2	5	5	5.625	0.679745
Worst	Coastal HM	4	6	6	8	8	5	8	8	6.625	0.564975
Worst	Heavy Metals	2	2	0	6	4	2	5	4	3.125	0.692756
Worst	Disease	3	1	2	5	4	2	5	3	3.125	0.515388
Worst	Marine debris	4	2	1	3	4	1	6	3	3	0.597614
Worst	Marine HM: ports	3	5	8	8	6	4	8	8	6.25	0.7258
Worst	Marine HM: jetties	3	3	8	8	4	1	6	8	5.125	0.971698
Worst	Marine HM: marinas	6	4	8	8	6	4	8	8	6.5	0.626783
Worst	Marine HM: dredging	2	2	8	8	4	2	8	7	5.125	1.02535
Worst	Nutrient discharge	2	4	3	6	6	4	5	5	4.375	0.497763
Worst	Oil spill	6	6	6	8	6	4	7	8	6.375	0.460493
Worst	IS: predators	2	2	0	6	4	2	3	5	3	0.681385
Worst	Sediment	2	7	5	5	6	3	6	5	4.875	0.580563
Worst	Thermal	2	2	0	6	2	3	4	1	2.5	0.654654

## Sheet: seagrass
Scenario	Threat	Respondent score															Mean (effect sore)	SE		Uncertainty score (worst minus best)															Mean	SE
		1	2	3	4	5	6	7	8	9	10	11	12	13	14	15				1	2	3	4	5	6	7	8	9	10	11	12	13	14	15
Best	Aqua: fish	0	5	2	0	2	0	0	6	1	8	0	1	2	1	0	1.86667	0.646357		5	2	4	6	6	6	6	2	3	0	8	5	6	5	3	4.46667	0.542188
Best	Aqua: oyster	2	0	0	0	2	2	4	6	1	1	0	1	1	0	0	1.33333	0.44365		3	0	2	4	6	3	4	2	4	0	8	4	7	2	3	3.46667	0.584455
Best	Acid SS	0	1	0	0	0	0	0	0	0	4	0	2	0	0	0	0.466667	0.290593		0	2	0	2	2		2	2	3	0	8	3	5	6	2	2.64286	0.595773
Best	Boating	1	0	2	0	0	1	2	2	1	2	6	1	2	0	0	1.33333	0.39841		7	2	4	2	8	2	3	6	2	1	2	4	5	2	2	3.46667	0.550901
Best	Brine	1	0	0	0	0	1	4	6	0	0	0	2	2	0	0	1.06667	0.462567		2	2	2	4	4	4	2	2	3	1	8	4	6	4	3	3.4	0.465986
Best	Coastal activites	0	0	2	0	0	0	2	0	0	0	0	0	0	0	0	0.266667	0.181703		0	0	1	2	0	3	4	2	2	0	2	2	3	2	2	1.66667	0.318728
Best	Coastal HM	0	1	3	0	0	0	3	2	0	2	2	2	0	0	0	1	0.308607		2	2	5	2	0	3	3	6	3	0	4	4	3	6	2	3	0.468025
Best	Disease	0	0	0	0	0	0	0	0	0	1	0	1	0	0	0	0.133333	0.0908514		2	2	2	2	8	3	4	2	2	1	8	4	3	5	2	3.33333	0.557773
Best	Extreme rainfall	0	0	0	0	0	0	2	2	0	2	0	2	0	2	0	0.666667	0.251976		2	2	2	0	0	4	4	6	0	2	8	4	3	4	3	2.93333	0.572935
Best	F: illegal	0	0	0	0	0	0	0	0	1	2	0	1	1	0	0	0.333333	0.159364		1	0	2	0	2	0	3	6	1	2	8	3	3	2	1	2.26667	0.572935
Best	F: line	1	0	1	0	0	0	0	0	0	4	0	0	1	0	0	0.466667	0.273716		3	0	1	1	2	3	3	2	2	0	2	4	3	2	1	1.93333	0.300264
Best	F: nets	0	0	0	0	2	0	3	0	1	6	0	1	3	0	0	1.06667	0.452155		2	0	3	2	2	5	2	8	2	1	4	4	2	6	2	3	0.534522
Best	F: pots	0	0	0	0	0	0	1	0	0	2	2	0	1	0	0	0.4	0.190238		0	0	2	1	0	3	4	2	2	0	2	3	2	2	1	1.6	0.320713
Best	F: trawl	0	1	3	0	0	1	3	2	2	8	4	1	3	0	0	1.86667	0.559478		6	3	5	2	8	4	4	6	3	0	4	5	5	6	3	4.26667	0.502059
Best	Global warming	0	6	0	0	0	0	4	2	2	5	0	2	0	2	0	1.53333	0.524329		0	2	6	4	8	3	4	4	2	1	8	4	5	4	2	3.8	0.595219
Best	HABs	0	0	0	0	0	0	2	2	0	1	0	2	2	0	0	0.6	0.235028		8	2	2	4	0	3	4	4	3	0	8	4	3	3	1	3.26667	0.605268
Best	Heavy Metals	0	0	0	0	0	0	2	6	1	3	0	2	0	2	0	1.06667	0.441498		0	0	2	6	2	4	4	2	2	0	8	4	7	4	2	3.13333	0.638948
Best	Hot weather	0	4	3	0	0	0	3	0	1	6	0	2	2	2	0	1.53333	0.476762		1	4	3	8	8	3	5	7	3	0	8	4	5	4	3	4.4	0.638451
Best	IS: filter feeders	0	0	0	0	0	1	0	0	0	3	0	2	2	0	0	0.533333	0.255728		2	2	1	3	2	4	4	0	3	1	8	4	1	4	3	2.8	0.499524
Best	IS: fouling	2	1	1	0	0	0	2	2	1	3	0	1	0	0	0	0.866667	0.255728		6	4	2	8	0	4	3	5	3	0	2	4	3	4	2	3.33333	0.540429
Best	IS: predators	0	0	0	0	0	0	2	0	0	1	0	1	1	0	0	0.333333	0.159364		3	2	2	2	2	3	2	2	3	2	8	4	3	6	2	3.06667	0.452155
Best	Marine debris	1	0	0	0	0	1	0	0	0	3	0	0	2	1	0	0.533333	0.236375		2	0	2	0	0	2	2	4	3	0	2	4	3	4	2	2	0.377964
Best	MHM: dredging	2	7	2	2	0	0	2	6	2	0	6	0	2	2	0	2.2	0.603166		5	1	6	4	8	2	4	2	4	4	2	4	6	4	3	3.93333	0.472749
Best	MHM: jetties	2	5	2	0	0	1	2	4	1	2	2	2	0	2	0	1.66667	0.373741		6	2	3	2	8	4	2	4	4	0	4	4	4	6	3	3.73333	0.502059
Best	MHM: marinas	2	5	4	0	2	1	3	2	2	2	0	1	2	2	0	1.86667	0.363405		6	2	3	8	6	3	2	6	4	0	8	5	6	2	2	4.2	0.626403
Best	MHM: ports	2	5	2	0	0	1	4	2	2	4	2	2	2	0	0	1.86667	0.400793		6	3	5	2	8	5	2	6	2	0	4	4	6	4	3	4	0.534522
Best	Nutrient discharge	1	6	2	2	2	1	2	8	2	3	2	3	2	2	0	2.53333	0.515167		4	2	6	4	6	4	5	0	3	0	4	4	6	6	2	3.73333	0.520683
Best	Ocean acidification	0	2	1	0	0	0	2	2	0	0	0	1	0	1	0	0.6	0.213809		0	4	1	4	3	4	6	6	3	0	8	5	7	3	2	3.73333	0.620803
Best	Oil spill	0	4	3	0	0	0	4	4	3	4	8	4	4	2	1	2.73333	0.581187		5	4	5	4	8	4	3	0	5	0	0	4	4	4	3	3.53333	0.559478
Best	Sea level rise	1	3	1	0	4	1	2	1	1	4	0	2	2	4	0	1.73333	0.371184		6	2	3	0	4	3	4	5	3	2	8	4	2	2	2	3.33333	0.503953
Best	Sediment	0	3	3	0	0	1	2	4	2	2	4	2	2	2	0	1.8	0.354562		5	2	4	2	8	3	3	4	3	1	4	4	6	4	2	3.66667	0.454257
Best	Shipping - H	4	2	5	0	0	1	2	4	1	2	4	2	3	0	0	2	0.436436		4	2	0	4	8	4	4	4	2	2	4	4	5	0	3	3.33333	0.513315
Best	Shipping - L	1	0	2	0	0	0	0	2	0	0	0	0	1	0	0	0.4	0.190238		7	2	0	2	8	3	2	6	2	0	8	4	4	4	2	3.6	0.674713
Best	Shipping - M	2	0	4	0	0	1	2	2	0	0	2	2	1	0	0	1.06667	0.315725		6	2	0	2	8	2	2	6	2	1	6	4	4	0	2	3.13333	0.623864
Best	Thermal	0	2	2	0	0	0	2	4	0	3	0	2	2	0	0	1.13333	0.350057		2	2	4	2	3	3	3	4	3	0	8	4	3	4	2	3.13333	0.445792
ML	A: fish	3	6	5	2	8	3	6	8	2	8	4	4	4	3	2	4.53333	0.567926
ML	A: oyster	3	0	0	4	8	3	6	8	3	1	4	3	3	2	1	3.26667	0.643404
ML	ASS	0	2	0	1	0		2	2	2	4	4	3	3	4	0	1.92857	0.398256
ML	Boating	3	2	5	2	2	2	4	6	2	2	8	3	4	2	0	3.13333	0.515167
ML	Brine	2	0	0	2	0	3	6	6	2	1	4	4	5	1	1	2.46667	0.542188
ML	Coastal activites	0	0	3	2	0	1	4	2	0	0	2	0	2	0	0	1.06667	0.344572
ML	Coastal HM	2	1	7	2	0	1	5	4	1	2	6	4	2	4	1	2.8	0.536301
ML	Disease	0	2	2	0	0	0	2	1	1	1	4	2	2	2	0	1.26667	0.300264
ML	Extreme rainfall	1	0	0	0	0	2	4	6	0	2	4	4	2	4	2	2.06667	0.502059
ML	F: illegal	0	0	0	0	0	0	3	2	1	2	4	2	3	2	0	1.26667	0.358126
ML	F: line	2	0	2	0	2	1	2	2	1	4	2	1	4	0	0	1.53333	0.336178
ML	F: nets	0	0	2	1	2	3	4	2	2	6	4	3	4	4	0	2.46667	0.456349
ML	F: pots	0	0	0	1	0	1	3	0	1	2	4	2	3	1	0	1.2	0.340867
ML	F: trawl	2	2	7	1	3	3	5	4	3	8	8	3	4	4	1	3.86667	0.584455
ML	Global warming	0	8	3	2	2	0	6	5	3	5	4	4	2	6	0	3.33333	0.622336
ML	HABs	2	1	1	2	0	2	4	4	2	1	4	4	3	1	0	2.06667	0.371184
ML	Heavy Metals	0	0	1	2	0	2	4	8	2	3	4	4	3	4	0	2.46667	0.567926
ML	Hot weather	0	6	5	4	3	3	7	3	2	6	4	4	4	6	2	3.93333	0.482717
ML	IS: filter feeders	0	2	0	1	0	2	3	0	2	3	4	4	3	2	2	1.86667	0.363405
ML	IS: fouling	6	3	2	2	0	2	5	5	2	3	2	3	2	2	2	2.73333	0.396012
ML	IS: predators	1	2	0	2	0	1	4	1	1	2	4	3	3	4	0	1.86667	0.376281
ML	Marine debris	2	0	0	0	0	1	1	2	2	3	2	2	3	3	0	1.4	0.305505
ML	MHM: dredging	5	8	8	4	8	3	4	7	4	2	8	2	4	4	1	4.8	0.626403
ML	MHM: jetties	4	5	3	0	8	2	2	3	3	2	6	4	2	4	1	3.26667	0.520683
ML	MHM: marinas	4	5	6	2	8	1	5	6	4	2	6	4	2	4	2	4.06667	0.511456
ML	MHM: ports	5	7	6	2	8	3	6	6	2	4	6	4	4	2	2	4.46667	0.515167
ML	Nutrient discharge	2	8	7	4	8	2	4	8	4	3	6	5	4	4	2	4.73333	0.564562
ML	Ocean acidification	0	4	2	2	2	2	6	4	1	0	4	4	2	3	2	2.53333	0.42389
ML	Oil spill	2	6	5	2	4	2	6	6	5	4	8	6	5	5	2	4.53333	0.476762
ML	Sea level rise	4	5	3	0	8	1	6	3	2	4	4	4	4	4	1	3.53333	0.524329
ML	Sediment	2	4	6	0	2	2	3	6	4	3	8	4	4	4	1	3.53333	0.533333
ML	Shipping - H	4	3	5	2	4	2	4	5	2	2	8	4	5	0	1	3.4	0.51455
ML	Shipping - L	4	1	2	2	3	1	2	4	1	0	6	2	3	2	0	2.2	0.416333
ML	Shipping - M	6	1	4	2	3	2	4	6	2	1	6	4	3	0	0	2.93333	0.52975
ML	Thermal	1	3	6	0	0	1	3	4	2	3	4	4	4	2	0	2.46667	0.466667
Worst	A: fish	5	7	6	6	8	6	6	8	4	8	8	6	8	6	3	6.33333	0.39841
Worst	A: oyster	5	0	2	4	8	5	8	8	5	1	8	5	8	2	3	4.8	0.718464
Worst	ASS	0	3	0	2	2		2	2	3	4	8	5	5	6	2	3.14286	0.580514
Worst	Boating	8	2	6	2	8	3	5	8	3	3	8	5	7	2	2	4.8	0.648808
Worst	Brine	3	2	2	4	4	5	6	8	3	1	8	6	8	4	3	4.46667	0.592546
Worst	Coastal activites	0	0	3	2	0	3	6	2	2	0	2	2	3	2	2	1.93333	0.407859
Worst	Coastal HM	2	3	8	2	0	3	6	8	3	2	6	6	3	6	2	4	0.632456
Worst	Disease	2	2	2	2	8	3	4	2	2	2	8	5	3	5	2	3.46667	0.550901
Worst	Extreme rainfall	2	2	2	0	0	4	6	8	0	4	8	6	3	6	3	3.6	0.702377
Worst	F: illegal	1	0	2	0	2	0	3	6	2	4	8	4	4	2	1	2.6	0.59201
Worst	F: line	4	0	2	1	2	3	3	2	2	4	2	4	4	2	1	2.4	0.320713
Worst	F: nets	2	0	3	2	4	5	5	8	3	7	4	5	5	6	2	4.06667	0.547433
Worst	F: pots	0	0	2	1	0	3	5	2	2	2	4	3	3	2	1	2	0.377964
Worst	F: trawl	6	4	8	2	8	5	7	8	5	8	8	6	8	6	3	6.13333	0.515167
Worst	Global warming	0	8	6	4	8	3	8	6	4	6	8	6	5	6	2	5.33333	0.614636
Worst	HABs	8	2	2	4	0	3	6	6	3	1	8	6	5	3	1	3.86667	0.653683
Worst	Heavy Metals	0	0	2	6	2	4	6	8	3	3	8	6	7	6	2	4.2	0.698297
Worst	Hot weather	1	8	6	8	8	3	8	7	4	6	8	6	7	6	3	5.93333	0.572935
Worst	IS: filter feeders	2	2	1	3	2	5	4	0	3	4	8	6	3	4	3	3.33333	0.513315
Worst	IS: fouling	8	5	3	8	0	4	5	7	4	3	2	5	3	4	2	4.2	0.578997
Worst	IS: predators	3	2	2	2	2	3	4	2	3	3	8	5	4	6	2	3.4	0.455652
Worst	Marine debris	3	0	2	0	0	3	2	4	3	3	2	4	5	5	2	2.53333	0.42389
Worst	MHM: dredging	7	8	8	6	8	2	6	8	6	4	8	4	8	6	3	6.13333	0.524329
Worst	MHM: jetties	8	7	5	2	8	5	4	8	5	2	6	6	4	8	3	5.4	0.550325
Worst	MHM: marinas	8	7	7	8	8	4	5	8	6	2	8	6	8	4	2	6.06667	0.564562
Worst	MHM: ports	8	8	7	2	8	6	6	8	4	4	6	6	8	4	3	5.86667	0.524329
Worst	Nutrient discharge	5	8	8	6	8	5	7	8	5	3	6	7	8	8	2	6.26667	0.502059
Worst	Ocean acidification	0	6	2	4	3	4	8	8	3	0	8	6	7	4	2	4.33333	0.708228
Worst	Oil spill	5	8	8	4	8	4	7	4	8	4	8	8	8	6	4	6.26667	0.482717
Worst	Sea level rise	7	5	4	0	8	4	6	6	4	6	8	6	4	6	2	5.06667	0.556063
Worst	Sediment	5	5	7	2	8	4	5	8	5	3	8	6	8	6	2	5.46667	0.542188
Worst	Shipping - H	8	4	5	4	8	5	6	8	3	4	8	6	8	0	3	5.33333	0.622336
Worst	Shipping - L	8	2	2	2	8	3	2	8	2	0	8	4	5	4	2	4	0.710466
Worst	Shipping - M	8	2	4	2	8	3	4	8	2	1	8	6	5	0	2	4.2	0.725062
Worst	Thermal	2	4	6	2	3	3	5	8	3	3	8	6	5	4	2	4.26667	0.520683

## Sheet: soft bottom
Scenario	Threat	Respondent score													Mean (effect sore)	SE		Uncertainty score (worst minus best)													Mean	SE
		1	2	3	4	5	6	7	8	9	10	11	12	13				1	2	3	4	5	6	7	8	9	10	11	12	13
Best	Aquaculture: fish	0	5	0	2	8	0	2	1	1	2	2	0	6	2.23077	0.7085		2	2	1	4	0	2	2	4	3	2	6	2	2	2.46154	0.417799
Best	Boating	0	0	0	2	8	1	0	3	0	0	0	0	3	1.30769	0.64435		3	0	1	2	0	1	2	4	2	1	2	2	2	1.69231	0.307692
Best	Brine	1	3	0	1	6	0	0	1	0	2	0	0	3	1.30769	0.498519		4	3	2	5	0	2	3	3	4	2	3	2	3	2.76923	0.342574
Best	Disease	1	0	0	0	3	0	0	1	0	0	0	0	3	0.615385	0.310881		2	2	0	4	0	2	1	2	2	2	5	2	2	2	0.375534
Best	Extreme rainfall	0	0	0	0	8	0	0	3	0	0	0	0	4	1.15385	0.677913		2	2	2	2	0	2	3	4	2	0	3	2	2	2	0.299572
Best	F: illegal	0	0	0	2	4	0	0	1	0	0	0	0	4	0.846154	0.421325		0	0	0	4	0	0	1	3	2	2	2	2	2	1.38462	0.367571
Best	F: line	0	0	0	0	0	0	0	2	0	0	0	0	3	0.384615	0.266469		2	0	0	2	0	0	1	3	2	2	2	2	2	1.38462	0.289528
Best	F: nets	0	0	0	0	3	0	0	0	0	0	0	0	4	0.538462	0.36891		3	0	0	3	0	0	3	1	3	3	5	2	3	2	0.452911
Best	F: pots	0	0	0	0	1	0	0	1	0	0	0	0	4	0.461538	0.312463		2	1	0	2	0	0	1	3	2	2	2	2	3	1.53846	0.291226
Best	F: trawl	2	5	0	2	8	4	0	5	4	3	2	2	8	3.46154	0.712664		3	2	2	6	0	2	4	3	4	2	6	4	0	2.92308	0.524545
Best	Global warming	1	2	2	0	8	0	0	3	0	1	0	0	3	1.53846	0.626502		3	4	3	4	0	4	2	3	5	2	2	2	4	2.92308	0.366227
Best	HABs	0	0	0	0	8	0	0	0	0	0	0	0	4	0.923077	0.664691		3	1	0	5	0	2	3	4	4	2	4	2	2	2.46154	0.43287
Best	Heavy metals	0	0	0	1	3	0	0	3	0	0	4	0	3	1.07692	0.430586		3	0	0	4	0	4	2	4	1	2	4	2	2	2.15385	0.436274
Best	Hot weather	0	2	0	0	8	0	1	1	0	0	0	0	3	1.15385	0.628859		3	4	0	2	0	4	2	4	2	2	2	4	2	2.38462	0.384615
Best	IS: filter feeders	0	2	0	2	5	0	0	0	0	2	0	0	4	1.15385	0.478327		4	4	0	5	0	2	4	2	3	2	8	4	4	3.23077	0.590022
Best	IS: fouling	0	0	0	0	5	2	0	2	0	0	0	2	4	1.15385	0.478327		3	2	0	7	0	1	2	2	2	3	6	4	4	2.76923	0.579056
Best	IS: predators	0	0	0	2	5	0	0	1	0	0	0	0	3	0.846154	0.436274		2	2	0	6	0	1	2	5	2	3	4	4	2	2.53846	0.501477
Best	Marine debris	0	0	0	2	2	0	0	1	0	0	0	2	4	0.846154	0.355292		3	1	0	4	2	0	1	2	3	3	4	2	2	2.07692	0.366227
Best	Marine HM: dredging	0	7	4	1	8	0	2	3	0	4	1	2	4	2.76923	0.717491		3	1	0	6	0	2	2	4	8	3	6	4	3	3.23077	0.661717
Best	Marine HM: jetties	0	6	2	0	8	0	0	2	0	1	2	0	4	1.92308	0.720234		3	2	1	4	0	2	2	3	8	3	5	2	3	2.92308	0.548442
Best	Marine HM: marinas	0	3	2	2	8	0	0	0	3	2	1	0	4	1.92308	0.635101		2	2	2	3	0	0	2	2	5	3	3	2	3	2.23077	0.360801
Best	Marine HM: ports	0	6	4	1	8	0	0	3	4	2	3	0	4	2.69231	0.701506		3	2	1	5	0	2	2	1	4	3	4	2	4	2.53846	0.402164
Best	Nutrient discharge	0	5	0	0	8	0	0	3	0	0	3	0	4	1.76923	0.72637		4	3	2	4	0	4	2	4	4	2	5	4	3	3.15385	0.372898
Best	Ocean acidification	0	6	0	1	8	0	0	1	0	1	0	0	4	1.61538	0.738488		4	2	0	6	0	4	3	2	8	3	2	4	4	3.23077	0.611365
Best	Oil spill	0	4	1	1	8	0	2	2	2	0	3	0	2	1.92308	0.614583		6	2	3	6	0	4	4	5	4	2	5	4	3	3.69231	0.472101
Best	Sediment	0	0	0	0	5	0	0	1	0	0	2	0	2	0.769231	0.410657		2	0	2	6	0	4	2	7	6	3	5	2		3.25	0.649098
Best	Shipping - H	1	5	0	0	8	2	0	5	0	0	2	1	5	2.23077	0.735142		3	3	0	4	0	2	4	3	8	1	4	4		3	0.603023
Best	Shipping - L	0	3	0	0	4	0	0	0	0	0	0	0	2	0.692308	0.382043		2	2	0	2	0	2	2	2	8	1	5	3	2	2.38462	0.583298
Best	Shipping - M	0	5	0	0	6	0	0	2	0	0	0	1	3	1.30769	0.581605		2	2	0	4	0	2	2	6	8	1	5	3	3	2.92308	0.645115
Best	Thermal	0	4	0	0	8	0	0	2	0	0	3	0	4	1.61538	0.693731		6	2	0	3	0	2	2	3	3	2	2	2	2	2.23077	0.410657
ML	Aquaculture: fish	2	5	1	4	8	0	2	3	2	3	5	0	6	3.15385	0.65873
ML	Boating	0	0	1	2	8	1	0	5	0	1	0	0	3	1.61538	0.674997
ML	Brine	3	4	2	4	6	2	1	2	2	3	1	0	4	2.61538	0.446331
ML	Disease	1	1	0	2	3	0	1	2	0	1	2	0	3	1.23077	0.302846
ML	Extreme rainfall	1	1	1	0	8	1	2	5	0	0	1	0	4	1.84615	0.66839
ML	F: illegal	0	0	0	4	4	0	0	3	0	1	0	0	4	1.23077	0.495542
ML	F: line	0	0	0	1	0	0	0	4	1	1	0	0	3	0.769231	0.360801
ML	F: nets	2	0	0	1	3	0	2	1	1	1	2	0	5	1.38462	0.400936
ML	F: pots	0	1	0	1	1	0	0	3	0	1	0	0	5	0.923077	0.415432
ML	F: trawl	3	7	2	4	8	4	2	7	4	4	5	4	8	4.76923	0.579056
ML	Global warming	3	4	4	2	8	2	1	4	2	2	0	0	5	2.84615	0.60813
ML	HABs	1	0	0	2	8	0	1	1	2	0	2	0	4	1.61538	0.625715
ML	Heavy metals	1	0	0	3	3	2	2	5	1	1	7	0	4	2.23077	0.590022
ML	Hot weather	1	4	0	0	8	2	1	2	0	1	0	2	3	1.84615	0.618581
ML	IS: filter feeders	2	4	0	5	5	2	2	0	1	3	4	2	6	2.76923	0.532939
ML	IS: fouling	1	2	0	4	5	3	1	2	0	2	2	4	6	2.46154	0.514101
ML	IS: predators	1	2	0	4	5	1	1	3	0	1	2	2	3	1.92308	0.415432
ML	Marine debris	2	1	0	4	4	0	0	3	1	2	2	4	5	2.15385	0.478327
ML	Marine HM: dredging	2	7	4	3	8	0	2	5	4	6	4	4	5	4.15385	0.597496
ML	Marine HM: jetties	2	7	2	0	8	2	2	4	4	2	4	0	5	3.23077	0.671335
ML	Marine HM: marinas	1	4	3	2	8	0	1	1	5	4	2	0	5	2.76923	0.651958
ML	Marine HM: ports	2	6	5	3	8	2	0	3	6	3	5	0	6	3.76923	0.680816
ML	Nutrient discharge	2	6	2	2	8	2	2	5	2	1	6	2	5	3.46154	0.616185
ML	Ocean acidification	2	8	0	3	8	2	1	1	4	3	0	2	6	3.07692	0.754997
ML	Oil spill	2	4	4	3	8	2	4	4	3	1	5	2	3	3.46154	0.488527
ML	Sediment	2	0	1	2	5	2	1	4	1	2	4	0	4	2.15385	0.450728
ML	Shipping - H	1	6	0	2	8	2	2	7	4	1	4	3	6	3.53846	0.703611
ML	Shipping - L	0	3	0	0	4	2	0	1	4	0	2	1	2	1.46154	0.417799
ML	Shipping - M	2	5	0	2	6	2	2	5	4	1	2	2	4	2.84615	0.491546
ML	Thermal	4	4	0	2	8	0	0	4	1	1	4	0	4	2.46154	0.675727
Worst	Aquaculture: fish	2	7	1	6	8	2	4	5	4	4	8	2	8	4.69231	0.701506
Worst	Boating	3	0	1	4	8	2	2	7	2	1	2	2	5	3	0.660225
Worst	Brine	5	6	2	6	6	2	3	4	4	4	3	2	6	4.07692	0.445224
Worst	Disease	3	2	0	4	3	2	1	3	2	2	5	2	5	2.61538	0.400936
Worst	Extreme rainfall	2	2	2	2	8	2	3	7	2	0	3	2	6	3.15385	0.648926
Worst	F: illegal	0	0	0	6	4	0	1	4	2	2	2	2	6	2.23077	0.600788
Worst	F: line	2	0	0	2	0	0	1	5	2	2	2	2	5	1.76923	0.468957
Worst	F: nets	3	0	0	3	3	0	3	1	3	3	5	2	7	2.53846	0.561767
Worst	F: pots	2	1	0	2	1	0	1	4	2	2	2	2	7	2	0.50637
Worst	F: trawl	5	7	2	8	8	6	4	8	8	5	8	6	8	6.38462	0.537545
Worst	Global warming	4	6	5	4	8	4	2	6	5	3	2	2	7	4.46154	0.538462
Worst	HABs	3	1	0	5	8	2	3	4	4	2	4	2	6	3.38462	0.594186
Worst	Heavy metals	3	0	0	5	3	4	2	7	1	2	8	2	5	3.23077	0.690168
Worst	Hot weather	3	6	0	2	8	4	3	5	2	2	2	4	5	3.53846	0.584143
Worst	IS: filter feeders	4	6	0	7	5	2	4	2	3	4	8	4	8	4.38462	0.665433
Worst	IS: fouling	3	2	0	7	5	3	2	4	2	3	6	6	8	3.92308	0.645115
Worst	IS: predators	2	2	0	8	5	1	2	6	2	3	4	4	5	3.38462	0.615385
Worst	Marine debris	3	1	0	6	4	0	1	3	3	3	4	4	6	2.92308	0.548442
Worst	Marine HM: dredging	3	8	4	7	8	2	4	7	8	7	7	6	7	6	0.566139
Worst	Marine HM: jetties	3	8	3	4	8	2	2	5	8	4	7	2	7	4.84615	0.677913
Worst	Marine HM: marinas	2	5	4	5	8	0	2	2	8	5	4	2	7	4.15385	0.696568
Worst	Marine HM: ports	3	8	5	6	8	2	2	4	8	5	7	2	8	5.23077	0.680816
Worst	Nutrient discharge	4	8	2	4	8	4	2	7	4	2	8	4	7	4.92308	0.654976
Worst	Ocean acidification	4	8	0	7	8	4	3	3	8	4	2	4	8	4.84615	0.741154
Worst	Oil spill	6	6	4	7	8	4	6	7	6	2	8	4	5	5.61538	0.487517
Worst	Sediment	2	0	2	6	5	4	2	8	6	3	7	2		3.91667	0.684068
Worst	Shipping - H	4	8	0	4	8	4	4	8	8	1	6	5		5	0.757249
Worst	Shipping - L	2	5	0	2	4	2	2	2	8	1	5	3	4	3.07692	0.582452
Worst	Shipping - M	2	7	0	4	6	2	2	8	8	1	5	4	6	4.23077	0.743811
Worst	Thermal	6	6	0	3	8	2	2	5	3	2	5	2	6	3.84615	0.638971
